# Supplementary material for: Regulation of Mec1 kinase activity by the SWI/SNF chromatin remodeling complex
Source: PubMed Central journal article supplement — Genes Dev. 2015 Mar 15;29(6):591–602. doi: 10.1101/gad.257626.114 (PMC4378192; doi:10.1101/gad.257626.114), 2015-03-15
Supplement: supp_29.6.591_SuppMaterial.pdf [file supp_29.6.591_SuppMaterial.pdf]

# Regulation of Mec1 Kinase activity by SWI/SNF Chromatin Remodeling Complex

## Supplemental Material

### Supplemental Figure 1

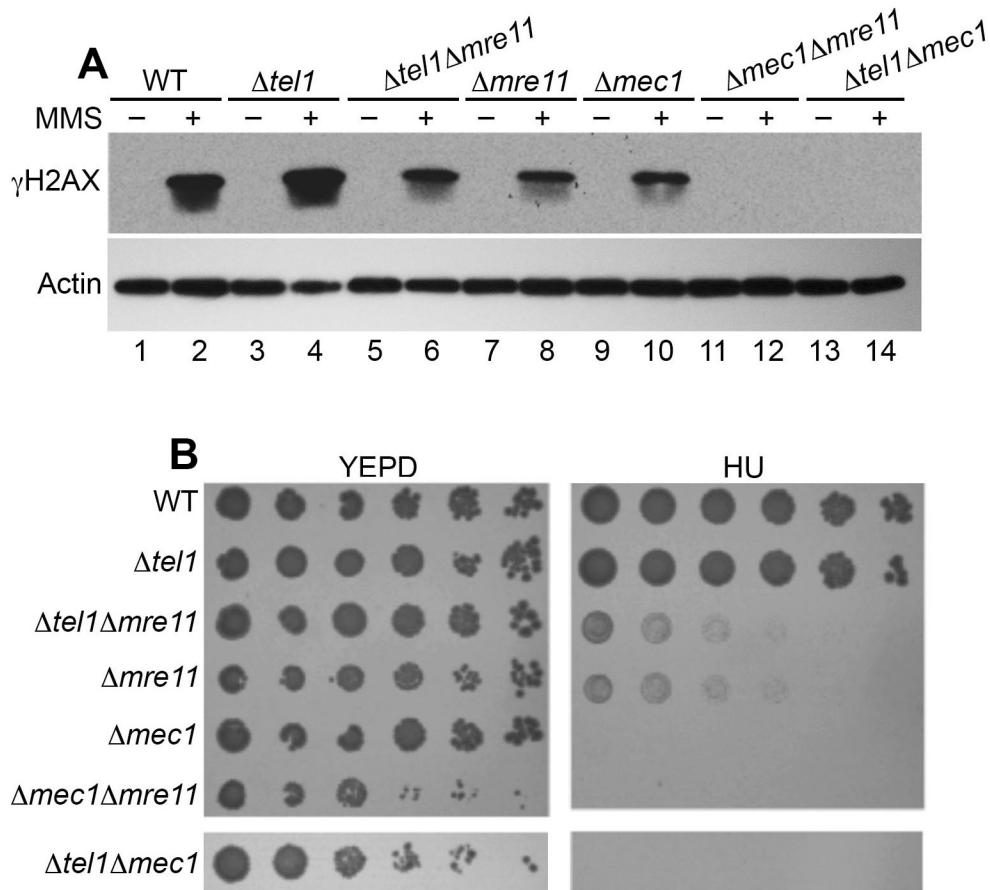

**Supplemental Figure 1: Genetic screening of Mec1/Tel1 pathways.** (A) Western blot analysis of  $\gamma$ -H2AX induction after MMS treatment in different mutants using whole-cell extracts (top panel). Actin was used as a loading control (bottom panel). (B) Serial dilutions (5-fold) of wild-type cells and the indicated mutants were tested for sensitivity to HU (50 mM). Plates were incubated at 30°C for 2 days and photographed.

## Supplemental Figure 2

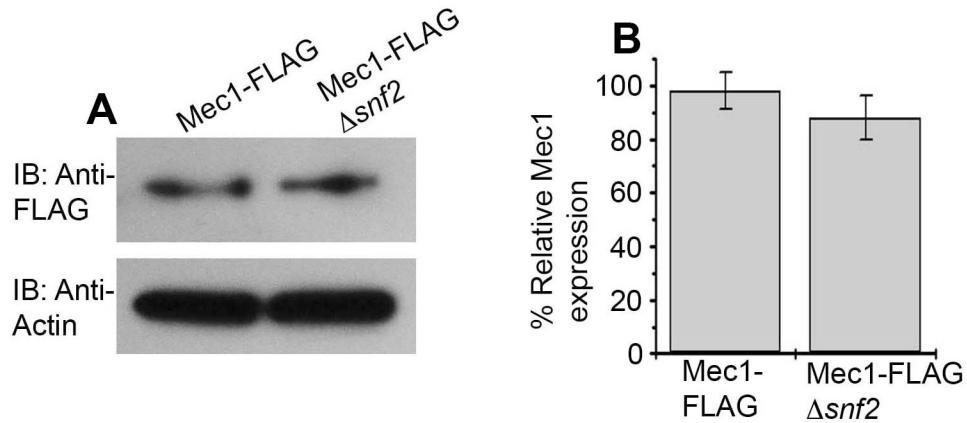

### Supplemental Figure 2: Mec1 protein level was not substantially reduced in $\Delta snf2$ .

(A) Western blot analysis of Mec1-FLAG in wild type (MEC1-FLAG) and mutant (Mec1-FLAG  $\Delta snf2$ ) strains using whole-cell extracts (top panel). Actin was used as a loading control (bottom panel). (B) Graph showing percentage relative expression of Mec1-FLAG in wild type (MEC1-FLAG) and mutant (Mec1-FLAG  $\Delta snf2$ ) strains as observed by protein levels using Western blot analysis in (A), results presented are the mean of five independent experiments  $\pm$  S.D.

### Supplemental Figure 3

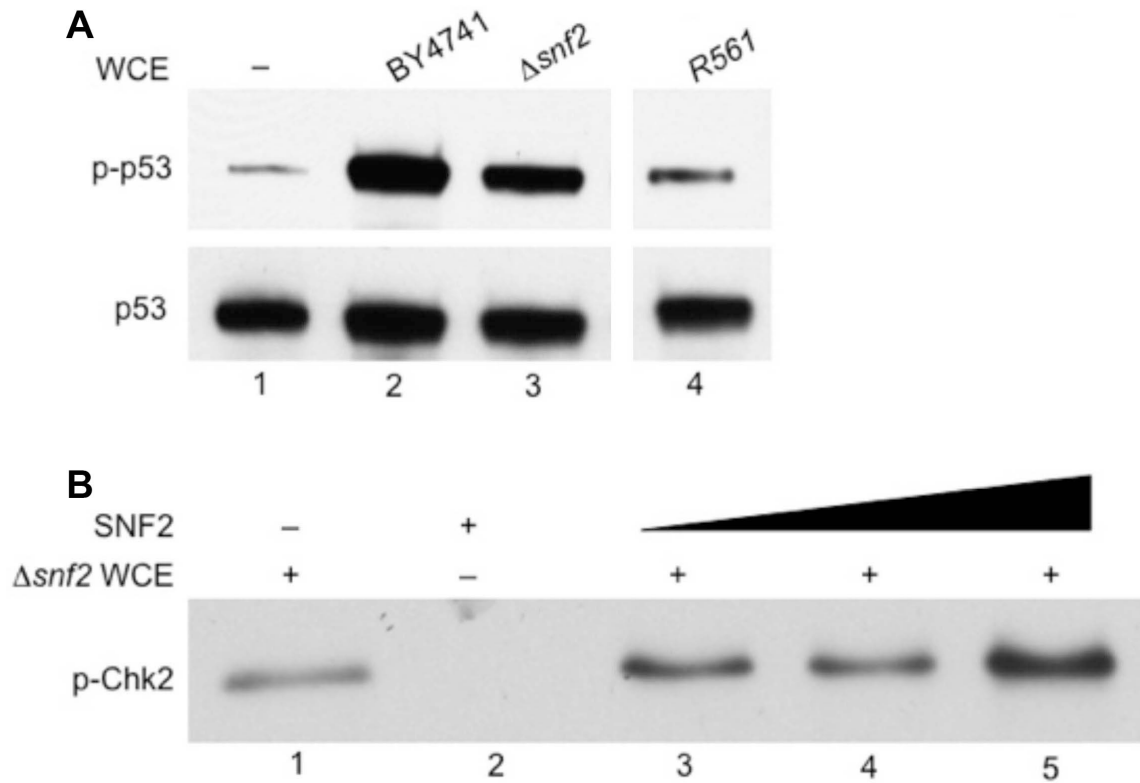

#### Supplemental Figure 3: Cell-free extract to address Mec1/Tel1 activity. (A)

Mec1/Tel1 Kinase Activity within whole cell extracts. In vitro Kinase assays contained ATP, GST-p53, and 5  $\mu$ g whole cell extracts of different strains as indicated. The phosphorylated p53 was detected by Phospho-p53 (Ser15) antibody (top panel, over-exposed to reveal background level of signal). Western analysis of p53 used in the reactions (bottom panel).

(B) Kinase assays contained 0.1  $\mu$ g whole cell extract of  $\Delta snf2$ , 100 nM GST-hChk2<sub>2-107</sub>, and SWI/SNF complex as indicated. Concentrations of SWI/SNF are 5, 10, 20 nM in lanes 3 to 5, respectively.

Supplemental Figure 4

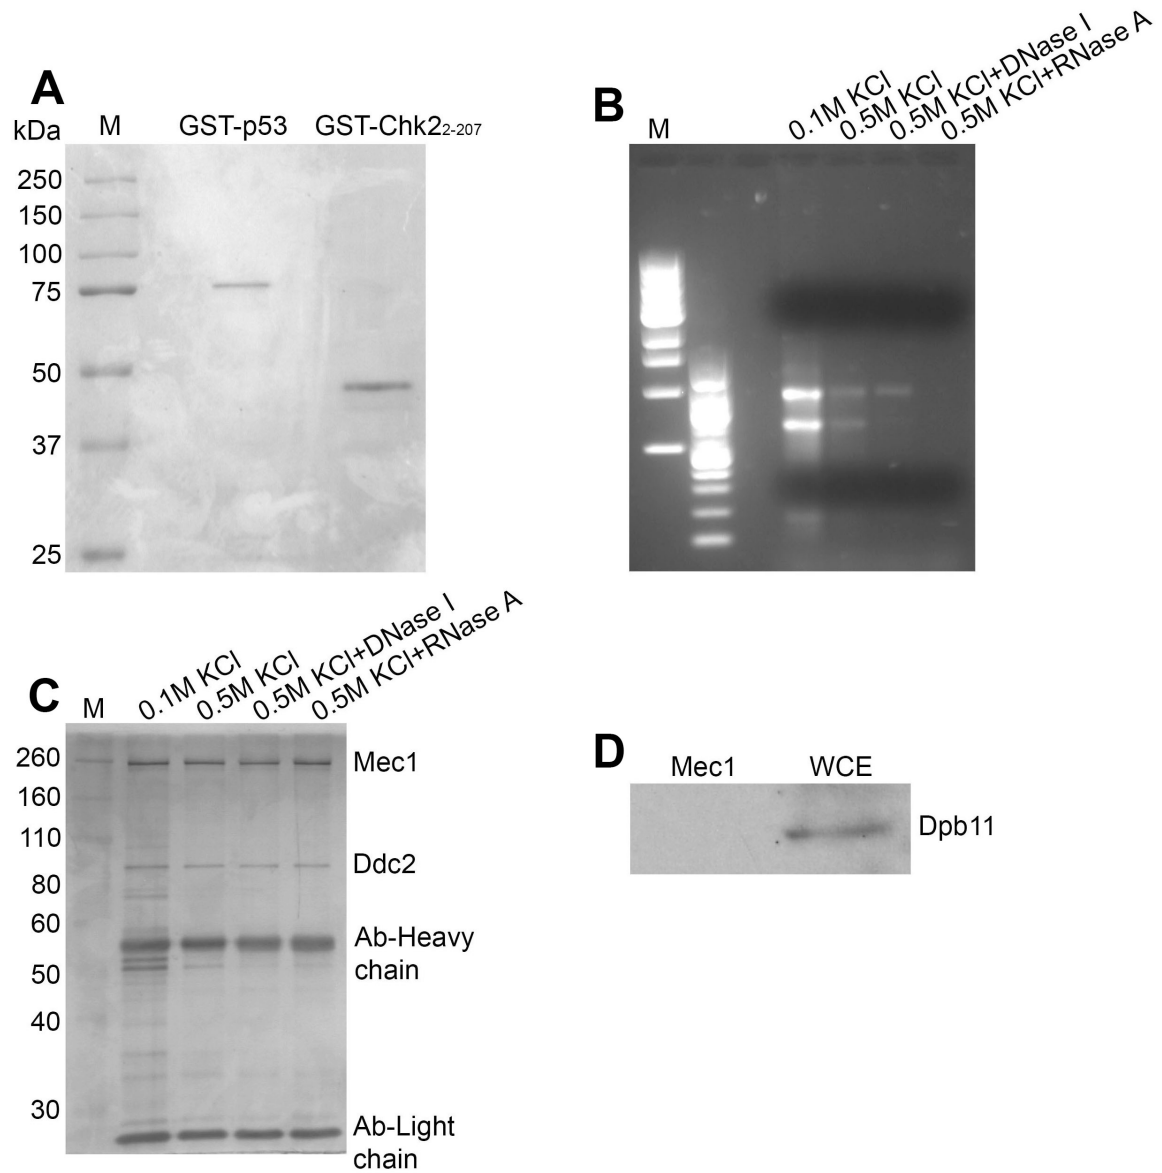

**Supplemental Figure 4: Purified components in Mec1 activation assay.** (A) SDS PAGE analysis of purified GST-p53, GST-Chk2<sub>2-207</sub>. Migration of molecular weight markers are indicated. Gel was stained with Coomassie blue. (B, C) Mec1-Lcd1 complexes were purified with low salt (0.1M KCl) buffer or high salt (0.5M KCl) buffer,

and were treated with DNase I or RNase A as indicated. Complexes were separated by 1% agarose gel and stained by Ethidium Bromide (B), or separated by 10% SDS PAGE gel followed by silver staining (C). (D) Western blot analysis of Dpb11, indicating there is no Dpb11 contamination in purified Mec1-Ddc2 complex.

### Supplemental Figure 5

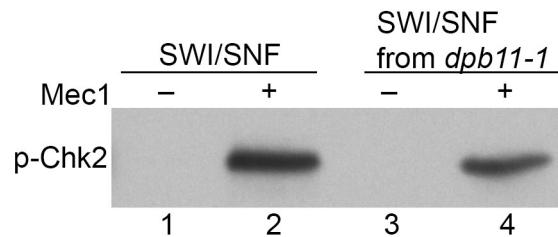

**Supplemental Figure 5: Activation of Mec1 by SWI/SNF complex in absence of known activator Dpb11.** SWI/SNF complex purified from  $\Delta dpb11-1$  mutant activates Mec1 kinase activity. Equimolar amounts of SWI/SNF (10nM) purified from wild type (Y300) and *dpb11-1* (Y1185) mutant strains were used in the standard kinase assay. SWI/SNF purified from slow-growing mutants such as *dpb11-1* frequently shows slightly reduced activities. The phosphorylated GST-hChk2<sub>2-107</sub> was detected by Western blot using Phospho-Chk2 (Thr68) antibodies.

Supplemental Figure 6

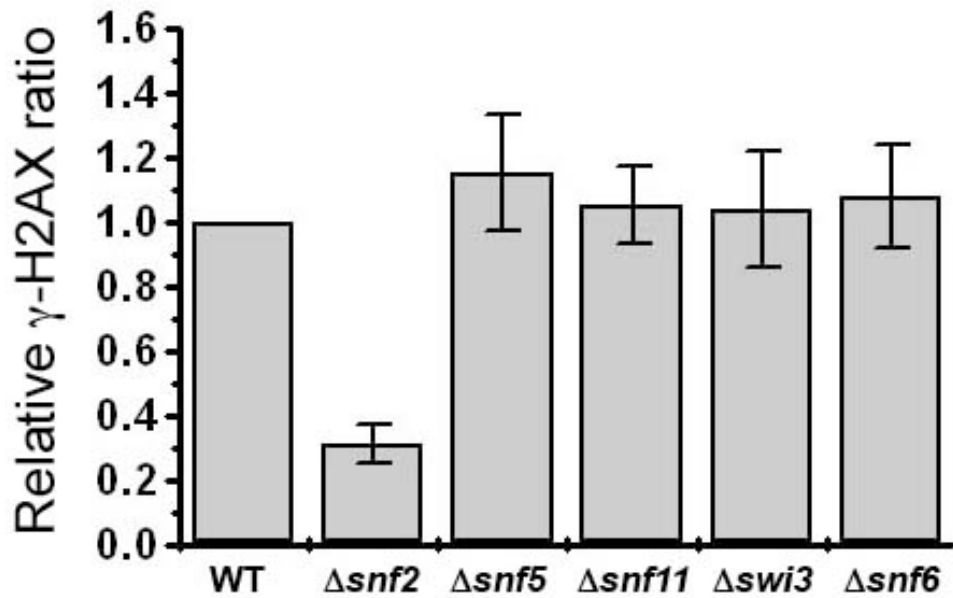

**Supplemental Figure 6: Snf2 subunit of the SWI/SNF complex is required for Mec1 activation.** Graph showing quantitative analysis of  $\gamma$ -H2AX level in various mutants described in Fig. 3a, and 3b. Results presented are the mean of five independent experiments  $\pm$  S.D.

## Supplemental Figure 7

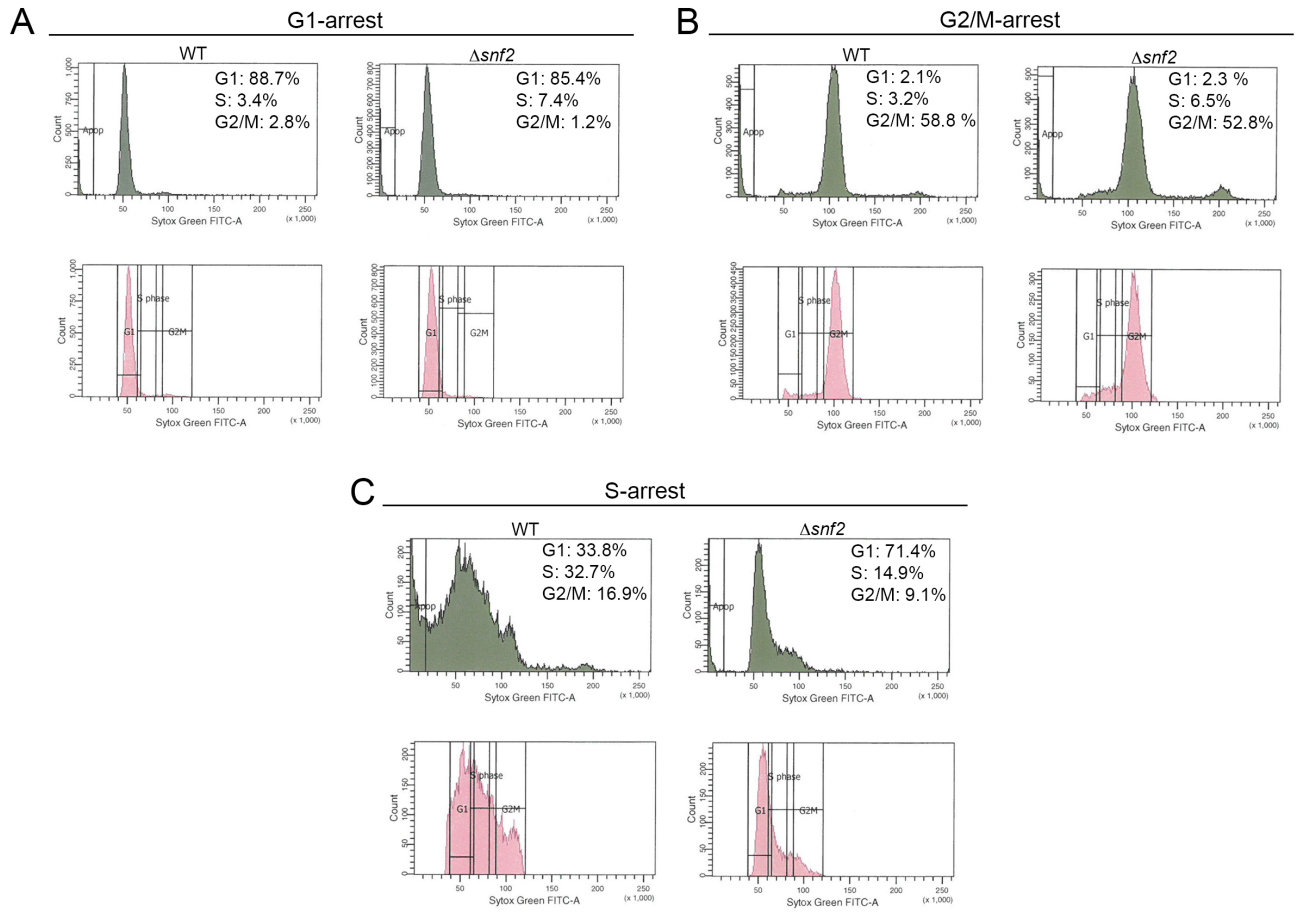

**Supplemental Figure 7: FACS analyses of DNA content of WT and  $\Delta snf2$  cells. (A-C)** WT and  $\Delta snf2$  cells were arrested at G1, G2/M, and S phase of the cell cycle separately as described in the experimental procedure, and their DNA content was measured by FACS analyses after 60 min. of arrest. G1, S, and G2/M phases are labeled in the respective lower panel.

**Supplemental Table 1**

| <b>Strain</b>                 | <b>Genotype</b>                                                                                                                    | <b>Reference</b>   |
|-------------------------------|------------------------------------------------------------------------------------------------------------------------------------|--------------------|
| BY4741(WT)                    | <i>MATa his3Δ1 leu2Δ0 met15Δ0 ura3Δ0</i>                                                                                           | Deletion library   |
| <i>Δtell</i>                  | <i>MATa tellΔ::KanMX his3Δ1 leu2Δ0 met15Δ0 ura3Δ0</i>                                                                              | Deletion library   |
| <i>Δmec1</i>                  | <i>MATa sml1Δ::KanMX mec1Δ::URA3 his3Δ1 leu2Δ0 met15Δ0 ura3Δ0</i>                                                                  | Deletion library   |
| <i>Δmre11</i>                 | <i>MATa mre11Δ::KanMX his3Δ1 leu2Δ0 met15Δ0 ura3Δ0</i>                                                                             | Deletion library   |
| <i>Δmre11Δtell</i>            | <i>MATa tellΔ::KanMX mre11Δ::HIS3 his3Δ1 leu2Δ0 met15Δ0 ura3Δ0</i>                                                                 | This study         |
| <i>Δmre11Δmec1</i>            | <i>MATa sml1Δ::KanMX mec1Δ::URA3 mre11Δ::HIS3 his3Δ1 leu2Δ0 met15Δ0 ura3Δ0</i>                                                     | This study         |
| R561<br>( <i>ΔtellΔmec1</i> ) | <i>MATα tellΔ::HIS3 sml1Δ::TRP1 mec1Δ::LEU2 rif1Δ::TRP1 rif2Δ:: KanMX ade2::hisG his3Δ200 leu2Δ0 met15Δ0 lys2Δ0 trp1Δ63 ura3Δ0</i> | (Chan et al. 2001) |
| <i>Δsnf2</i>                  | <i>MATa snf2Δ::HIS3 his3Δ1 leu2Δ0 met15Δ0 ura3Δ0</i>                                                                               | This study         |
| <i>ΔtellΔsnf2</i>             | <i>MATa snf2Δ::HIS3 tellΔ::URA3 his3Δ1 leu2Δ0 met15Δ0 ura3Δ0</i>                                                                   | This study         |
| <i>Δmre11Δsnf2</i>            | <i>MATa snf2Δ::HIS3 mre11Δ::URA3 his3Δ1 leu2Δ0 met15Δ0 ura3Δ0</i>                                                                  | This study         |
| <i>Δmre11Δino80</i>           | <i>MATa mre11Δ::KanMX ino80Δ::HIS3 his3Δ1 leu2Δ0 met15Δ0</i>                                                                       | This study         |



|                       |                                                                              |                               |
|-----------------------|------------------------------------------------------------------------------|-------------------------------|
|                       | <i>ura3Δ0</i>                                                                |                               |
| <i>Δmre11Δswr1</i>    | <i>MATa mre11Δ::KanMX swr1Δ::HIS3 his3Δ1 leu2Δ0 met15Δ0</i><br><i>ura3Δ0</i> | This study                    |
| <i>Δexo1</i>          | <i>MATa exo1Δ::KanMX his3Δ1 leu2Δ0 met15Δ0 ura3Δ0</i>                        | Deletion<br>library           |
| <i>Δsnf2Δexo1</i>     | <i>MATa snf2Δ::HIS3 exo1Δ::URA3 his3Δ1 leu2Δ0 met15Δ0 ura3Δ0</i>             | This study                    |
| <i>Δsgs1</i>          | <i>MATa sgs1Δ::KanMX his3Δ1 leu2Δ0 met15Δ0 ura3Δ0</i>                        | Deletion<br>library           |
| <i>Δsgs1Δsnf2</i>     | <i>MATa sgs1Δ::KanMX snf2Δ::LEU2 his3Δ1 leu2Δ0 met15Δ0</i><br><i>ura3Δ0</i>  | This study                    |
| <i>Δrad17</i>         | <i>MATa rad17Δ::KanMX his3Δ1 leu2Δ0 met15Δ0 ura3Δ0</i>                       | Deletion<br>library           |
| <i>Δrad17Δsnf2</i>    | <i>MATa rad17Δ::KanMX snf2Δ::URA3 his3Δ1 leu2Δ0 met15Δ0</i><br><i>ura3Δ0</i> | This study                    |
| <i>Δddc1</i>          | <i>MATa ddc1Δ::KanMX his3Δ1 leu2Δ0 met15Δ0 ura3Δ0</i>                        | Deletion<br>library           |
| <i>Δddc1Δsnf2</i>     | <i>MATa ddc1Δ::KanMX snf2Δ::URA3 his3Δ1 leu2Δ0 met15Δ0</i><br><i>ura3Δ0</i>  | This study                    |
| Y300 (WT)             | <i>MATa ade2-1 trp1-1 ura3-1 leu2-3 his3-11</i>                              | (Wang and<br>Elledge<br>2002) |
| Y1185 ( <i>dbp11-</i> | <i>MATa dpb11-1 ade2-1 trp1-1 ura3-1 leu2-3 his3-11</i>                      | (Wang and                     |

|                               |                                                                                                                                                  |                           |
|-------------------------------|--------------------------------------------------------------------------------------------------------------------------------------------------|---------------------------|
| 1)                            |                                                                                                                                                  | Elledge<br>2002)          |
| Y1185- $\Delta snf2$          | <i>MATa dpb11-1 snf2<math>\Delta</math>::URA3 ade2-1 trp1-1 ura3-1 leu2-3 his3-11</i>                                                            | Deletion<br>library       |
| $\Delta snf5$                 | <i>MATa snf5<math>\Delta</math>::KanMX his3<math>\Delta</math>1 leu2<math>\Delta</math>0 met15<math>\Delta</math>0 ura3<math>\Delta</math>0</i>  | Deletion<br>library       |
| $\Delta snf6$                 | <i>MATa snf6<math>\Delta</math>::KanMX his3<math>\Delta</math>1 leu2<math>\Delta</math>0 met15<math>\Delta</math>0 ura3<math>\Delta</math>0</i>  | Deletion<br>library       |
| $\Delta snf11$                | <i>MATa snf11<math>\Delta</math>::KanMX his3<math>\Delta</math>1 leu2<math>\Delta</math>0 met15<math>\Delta</math>0 ura3<math>\Delta</math>0</i> | Deletion<br>library       |
| $\Delta swi3$                 | <i>MATa swi3<math>\Delta</math>::KanMX his3<math>\Delta</math>1 leu2<math>\Delta</math>0 met15<math>\Delta</math>0 ura3<math>\Delta</math>0</i>  | Deletion<br>library       |
| <i>MEC1-FLAG</i>              | <i>MATa MEC1-FLAG his3<math>\Delta</math>1 leu2<math>\Delta</math>0 met15<math>\Delta</math>0 ura3<math>\Delta</math>0</i>                       | (Morrison et<br>al. 2007) |
| <i>TEL1-FLAG</i>              | <i>MATa TEL1-FLAG his3<math>\Delta</math>1 leu2<math>\Delta</math>0 met15<math>\Delta</math>0 ura3<math>\Delta</math>0</i>                       | This study                |
| R561-DPB11-<br><i>FLAG</i>    | As R561, [pDPB11-FLAG]                                                                                                                           | This study                |
| <i>MEC1-FLAG-<br/>SNF2-HA</i> | <i>MATa MEC1-FLAG his3<math>\Delta</math>1 leu2<math>\Delta</math>0 met15<math>\Delta</math>0 ura3<math>\Delta</math>0 [pSNF2-HA]</i>            | This study                |
| <i>TEL1-FLAG-<br/>SNF2-HA</i> | <i>MATa TEL1-FLAG his3<math>\Delta</math>1 leu2<math>\Delta</math>0 met15<math>\Delta</math>0 ura3<math>\Delta</math>0 [pSNF2-HA]</i>            | This study                |
| R561-SNF2-<br><i>FLAG</i>     | As R561, [pSNF2-FLAG]                                                                                                                            | This study                |

|                                            |                                                                                                                                                                    |                        |
|--------------------------------------------|--------------------------------------------------------------------------------------------------------------------------------------------------------------------|------------------------|
| R561-<br><i>SNF2(K798A)-<br/>FLAG</i>      | As R561, [pSNF2(K798A)-FLAG]                                                                                                                                       | This study             |
| R561- <i>INO80-<br/>FLAG</i>               | As R561, <i>INO80-FLAG</i>                                                                                                                                         | (Morrison et al. 2007) |
| R561- <i>IPK2-<br/>FLAG</i>                | As R561, [pIPK2-FLAG]                                                                                                                                              | This study             |
| $\Delta$ <i>snf2-SNF2-<br/>FLAG</i>        | <i>MATa snf2<math>\Delta</math>::HIS3 his3<math>\Delta</math>1 leu2<math>\Delta</math>0 met15<math>\Delta</math>0 ura3<math>\Delta</math>0</i> [pSNF2-FLAG]        | This study             |
| $\Delta$ <i>snf2-SNF2(K798A)-<br/>FLAG</i> | <i>MATa snf2<math>\Delta</math>::HIS3 his3<math>\Delta</math>1 leu2<math>\Delta</math>0 met15<math>\Delta</math>0 ura3<math>\Delta</math>0</i> [pSNF2(K798A)-FLAG] | This study             |
| $\Delta$ <i>snf2-MEC1-<br/>FLAG</i>        | <i>MATa MEC1-FLAG snf2<math>\Delta</math>::LEU2 his3<math>\Delta</math>1 leu2<math>\Delta</math>0 met15<math>\Delta</math>0 ura3<math>\Delta</math>0</i>           | This study             |
| Y300- <i>SNF2-<br/>FLAG</i>                | As Y300, [pSNF2-FLAG]                                                                                                                                              | This study             |
| Y1185- <i>SNF2-<br/>FLAG</i>               | As Y1185, [pSNF2-FLAG]                                                                                                                                             | This study             |
| BY4741-<br><i>MEC1-FLAG</i>                | As BY4741, [pMEC1-FLAG]                                                                                                                                            | This study             |
| BY4741-<br><i>MEC1kd-FLAG</i>              | As BY4741, [pMEC1kd-FLAG]                                                                                                                                          | This study             |

|                       |                                   |            |
|-----------------------|-----------------------------------|------------|
| <i>RAD53-HA</i>       | As BY4711, <i>RAD53-HA</i>        | This study |
| <i>Δsnf2 RAD53-HA</i> | As <i>snf2Δ</i> , <i>RAD53-HA</i> | This study |

**Supplemental Table 2**

| Protein | Protein probability | % Coverage | Num unique preps | Total Indep. Spectra | Protein ID |
|---------|---------------------|------------|------------------|----------------------|------------|
| YNR023W | 1                   | 80.4       | 44               | 456                  | SNF12      |
| YJL176C | 1                   | 77.7       | 133              | 711                  | SWI3       |
| YGR275W | 1                   | 73.9       | 7                | 11                   | RTT102     |
| YHL025W | 1                   | 66.9       | 13               | 52                   | SNF6       |
| YPL129W | 1                   | 64.8       | 20               | 121                  | TAF14      |
| YOR290C | 1                   | 56.4       | 112              | 824                  | SNF2       |
| YDR073W | 1                   | 49.1       | 4                | 262                  | SNF11      |
| YPL016W | 1                   | 48.6       | 32               | 231                  | SWI1       |
| YMR033W | 1                   | 43.7       | 35               | 170                  | ARP9       |
| YNL064C | 1                   | 42.8       | 5                | 23                   | YDJ1       |
| YLL024C | 1                   | 40.2       | 14               | 30                   | SSA2       |
| YBR289W | 1                   | 39.6       | 36               | 443                  | SNF5       |
| YPRO34W | 1                   | 37.9       | 17               | 38                   | ARP7       |
| YDR499W | 1                   | 37.5       | 7                | 29                   | LCD1       |
| YBR136W | 1                   | 32.1       | 33               | 93                   | MEC1       |

### Supplemental Table 3

| Protein-protein | Crosslinking sites    | Peptide 1                                                                                                                                                                                          | Peptide 2                                                                                                                                    |
|-----------------|-----------------------|----------------------------------------------------------------------------------------------------------------------------------------------------------------------------------------------------|----------------------------------------------------------------------------------------------------------------------------------------------|
| LCD1---SNF5     |                       |                                                                                                                                                                                                    |                                                                                                                                              |
| 1               | LCD1:120---SNF5:174   | R.QIEQQK[1808.98]GQQTAAQTQLEQQR.Q                                                                                                                                                                  | K.QELQK[2535.3]LEDEK[284.17]K.F                                                                                                              |
| LCD1---SNF2     |                       |                                                                                                                                                                                                    |                                                                                                                                              |
| 2               | LCD1:712---SNF2:1279  | K.RESGVEEEEEELK[2353.17]DSEINEILAR.N                                                                                                                                                               | R.IMQVK[2839.41]YDEK[284.17]FQEM[147.04]AR.T                                                                                                 |
| LCD1---MEC1     |                       |                                                                                                                                                                                                    |                                                                                                                                              |
| 1               | LCD1:676---MEC1:406   | R.HLVDSLHDLTIK[1059.57]DQASYEDAFEDLPEYIEEELK.M                                                                                                                                                     | K.FNK[4333.08]TER.G                                                                                                                          |
| 2               | LCD1:676---MEC1:395   | R.HLVDSLHDLTIK[1051.64]DQASYEDAFEDLPEYIEEELK.M                                                                                                                                                     | K.QLEK[4333.08]LR.L                                                                                                                          |
| MEC1---SNF5     |                       |                                                                                                                                                                                                    |                                                                                                                                              |
| 1               | MEC1:1072---SNF5:174  | R.QIEQQK[926.52]GQQTAAQTQLEQQR.Q                                                                                                                                                                   | R.K[2535.3]QTER.S                                                                                                                            |
| 4               | MEC1:674---SNF5:447   | K.LK[284.17]VYK[1098.65]QAM[147.04]NETSEQLVPIR.L                                                                                                                                                   | K.NM[147.04]AK[2684.45]ILK.K                                                                                                                 |
| MEC1---SNF2     |                       |                                                                                                                                                                                                    |                                                                                                                                              |
| 5               | MEC1:1072---SNF2:1138 | R.LDGHTK[926.52]SDER.S<br>R.LDGHTK[926.52]SDER.S                                                                                                                                                   | R.K[1422.71]QTER.S<br>R.K[1422.71]QTER.S                                                                                                     |
| 6               | MEC1:1072---SNF2:675  | K.LLDQTK[926.52]DTR.I                                                                                                                                                                              | R.K[1354.75]QTER.S                                                                                                                           |
| 9               | MEC1:56---SNF2:1138   | R.LDGHTK[1038.58]SDER.S                                                                                                                                                                            | R.NLK[1422.71]DQR.R                                                                                                                          |
| 15              | MEC1:1577---SNF2:1355 | R.EVLLQYNIK[2536.2]ALIAISNEDPLR.T<br>R.EVLLQYNIK[2552.2]ALIAISNEDPLR.T<br>R.EVLLQYNIK[2536.2]ALIAISNEDPLR.T                                                                                        | R.ERK[2748.54]TATYNDNMSEEQWLR.Q<br>R.ERK[2748.54]TATYNDNM[147.04]SEEQWLR.Q<br>R.ERK[2748.54]TATYNDNMSEEQWLR.Q                                |
| 18              | MEC1:2318---SNF2:1306 | R.NMDHSIQK[1411.79]ALK.V                                                                                                                                                                           | R.SK[1549.83]KEEELGVK.S                                                                                                                      |
| 19              | MEC1:674---SNF2:1441  | R.ADTDLAMNDDDFLSK[1082.65]K.R<br>R.ADTDLAMNDDDFLSK[1082.65]K.R<br>R.ADTDLAMNDDDFLSK[1082.65]K.R<br>R.ADTDLAMNDDDFLSK[1082.65]K.R<br>R.ADTDLAMNDDDFLSK[1082.65]K.R<br>R.ADTDLAMNDDDFLSK[1082.65]K.R | K.NMAK[2063.97]ILK.K<br>K.NMAK[2063.97]ILK.K<br>K.NMAK[2063.97]ILK.K<br>K.NMAK[2063.97]ILK.K<br>K.NMAK[2063.97]ILK.K<br>K.NMAK[2063.97]ILK.K |
| LCD1            |                       |                                                                                                                                                                                                    |                                                                                                                                              |
| 1               | LCD1:120---LCD1:125   | K.QELQK[1026.56]LEDEK.K                                                                                                                                                                            | K.LEDEK[1524.8]K.F                                                                                                                           |
| 2               | LCD1:113---LCD1:115   | K.HLQELAK[1151.69]LK[284.17]QELQK.L<br>K.HLQELAK[1151.69]LK.Q<br>K.HLQELAK[1151.69]LK.Q                                                                                                            | K.LK[2127.23]QELQK.L<br>K.LK[1344.81]QELQK.L<br>K.LK[1344.81]QELQK.L                                                                         |
| 3               | LCD1:93---LCD1:99     | K.NIQAVK[1194.7]VNELQVK.H                                                                                                                                                                          | K.EK[1748.02]NIQAVK.V                                                                                                                        |
| 5               | LCD1:91---LCD1:99     | K.NIQAVK[1451.83]VNELQVK.H                                                                                                                                                                         | R.EK[1748.02]EKNIQAVK.V                                                                                                                      |
| 7               | LCD1:126---LCD1:145   | R.EVITNVK[1287.7]PPSTTLTNTNTITPDSSVAIEAK.P                                                                                                                                                         | K.K[3580.87]FLQMEAR.G                                                                                                                        |
| 8               | LCD1:81---LCD1:91     | R.DK[798.45]INFLNIER.E                                                                                                                                                                             | R.EK[1526.85]EK.N                                                                                                                            |
| 9               | LCD1:506---LCD1:531   | R.NIGDNELGGLISK[2265.12]LIYTDR.L                                                                                                                                                                   | K.EDIGMDSK[2356.26]FTAPIIGYK.M                                                                                                               |
| 10              | LCD1:106---LCD1:115   | K.VNELQVK[1151.69]HLQELAK.L<br>K.VNELQVK[1151.69]HLQELAK.L                                                                                                                                         | K.LK[1914.09]QELQK.L<br>K.LK[1914.09]QELQK.L                                                                                                 |
| 11              | LCD1:70---LCD1:81     | K.NDNQLVNQLNK[1526.85]AQGEASMLR.D<br>K.NDNQLVNQLNK[1526.85]AQGEASMLR.D<br>K.NDNQLVNQLNK[1526.85]AQGEASMLR.D<br>K.NDNQLVNQLNK[1526.85]AQGEASMLR.D                                                   | R.DK[2508.28]INFLNIER.E<br>R.DK[2508.28]INFLNIER.E<br>R.DK[2508.28]INFLNIER.E<br>R.DK[2508.28]INFLNIER.E                                     |
| 12              | LCD1:180---LCD1:188   | K.K[1195.72]NM[147.04]VPLNPNR.I<br>K.K[1195.72]NMVPLNPNR.I<br>K.K[1195.72]NM[147.04]VPLNPNR.I                                                                                                      | R.K[1463.79]SDNLLK.K<br>R.K[1447.8]ISDNLLK.K<br>R.K[1463.79]SDNLLK.K                                                                         |

| MEC1 |                       |                                                                                                                                                                                                                                                                                                                                                                                                                                                                                                                                                                                                                                                                                                                                                                              |
|------|-----------------------|------------------------------------------------------------------------------------------------------------------------------------------------------------------------------------------------------------------------------------------------------------------------------------------------------------------------------------------------------------------------------------------------------------------------------------------------------------------------------------------------------------------------------------------------------------------------------------------------------------------------------------------------------------------------------------------------------------------------------------------------------------------------------|
| 1    | MEC1:1979---MEC1:2005 | R.QHSQNPHDLVSSALDLTK[2288.17]ALTR.V<br>K.DFK[2696.42]FDMNVAPSAMVVPVR.K                                                                                                                                                                                                                                                                                                                                                                                                                                                                                                                                                                                                                                                                                                       |
| 2    | MEC1:406---MEC1:515   | R.INPNRPEAAGK[1059.57]SEIFR.I<br>K.FNK[2064.11]TER.G                                                                                                                                                                                                                                                                                                                                                                                                                                                                                                                                                                                                                                                                                                                         |
| 3    | MEC1:406---MEC1:414   | R.GTLLK[1059.57]YR.V<br>R.GTLLK[1059.57]YR.V<br>K.FNK[1115.67]TER.G<br>K.FNK[1115.67]TER.G                                                                                                                                                                                                                                                                                                                                                                                                                                                                                                                                                                                                                                                                                   |
| 4    | MEC1:1990---MEC1:2081 | R.VC[160.03]LQDVK[911.51]SITSR.S<br>R.VC[160.03]LQDVK[911.51]SITSR.S<br>R.VC[160.03]LQDVK[911.51]SITSR.S<br>R.VC[160.03]LQDVK[911.51]SITSR.S<br>K.K[1670.9]EDVR.Q<br>K.K[1670.9]EDVR.Q<br>K.K[1670.9]EDVR.Q<br>K.K[1670.9]EDVR.Q                                                                                                                                                                                                                                                                                                                                                                                                                                                                                                                                             |
| 5    | MEC1:1990---MEC1:2005 | K.DFK[1670.9]FDMNVAPSAMVVPVR.K<br>K.DFK[1670.9]FDMNVAPSAMVVPVR.K<br>K.DFK[1670.9]FDMNVAPSAMVVPVR.K<br>R.VC[160.03]LQDVK[2288.17]SITSR.S<br>R.VC[160.03]LQDVK[2288.17]SITSR.S<br>R.VC[160.03]LQDVK[2288.17]SITSR.S                                                                                                                                                                                                                                                                                                                                                                                                                                                                                                                                                            |
| 6    | MEC1:1990---MEC1:1998 | R.VC[160.03]LQDVK[1013.58]SITSR.S<br>R.VC[160.03]LQDVK[1013.58]SITSR.S<br>R.SGK[1670.9]SLEK.D<br>R.SGK[1670.9]SLEK.D                                                                                                                                                                                                                                                                                                                                                                                                                                                                                                                                                                                                                                                         |
| 7    | MEC1:1055---MEC1:1072 | R.STTDLIPIFANLKSNNK[1082.62]YVINQNLDDIEVYLR.R<br>R.STTDLIPIFANLKSNNK[1082.62]YVINQNLDDIEVYLR.R<br>R.RK[4076.15]QTER.S<br>R.RK[4076.15]QTER.S                                                                                                                                                                                                                                                                                                                                                                                                                                                                                                                                                                                                                                 |
| 8    | MEC1:1083---MEC1:1134 | R.SIDFTPK[981.54]K.V<br>K.HEFK[1200.68]R.T                                                                                                                                                                                                                                                                                                                                                                                                                                                                                                                                                                                                                                                                                                                                   |
| 9    | MEC1:414---MEC1:515   | R.INPNRPEAAGK[1115.67]SEIFR.I<br>R.GTLLK[2064.11]YR.V                                                                                                                                                                                                                                                                                                                                                                                                                                                                                                                                                                                                                                                                                                                        |
| 10   | MEC1:2283---MEC1:2294 | R.K[1499.84]NEVALMNVETIMYDR.N<br>R.K[1499.84]NEVALMNVETIMYDR.N<br>R.K[1499.84]NEVALMNVETIMYDR.N<br>R.K[1499.84]NEVALMNVETIMYDR.N<br>R.K[1499.84]NEVALMNVETIMYDR.N<br>R.K[1515.83]NEVALMNVETIMYDR.N<br>R.K[1515.83]NEVALMNVETIMYDR.N<br>R.K[1515.83]NEVALMNVETIMYDR.N<br>R.K[1515.83]NEVALMNVETIMYDR.N<br>R.K[1515.83]NEVALMNVETIMYDR.N<br>R.K[1515.83]NEVALMNVETIMYDR.N<br>R.K[1515.83]NEVALMNVETIMYDR.N<br>K.K[2304.19]SSEVTLALMR.K<br>K.K[2304.19]SSEVTLALMR.K<br>K.K[2304.19]SSEVTLALMR.K<br>K.K[2304.19]SSEVTLALMR.K<br>K.K[2304.19]SSEVTLALMR.K<br>K.K[2304.19]SSEVTLALM[147.04]R.K<br>K.K[2304.19]SSEVTLALM[147.04]R.K<br>K.K[2304.19]SSEVTLALM[147.04]R.K<br>K.K[2304.19]SSEVTLALM[147.04]R.K<br>K.K[2304.19]SSEVTLALM[147.04]R.K<br>K.K[2304.19]SSEVTLALM[147.04]R.K |
| 11   | MEC1:395---MEC1:406   | K.FNK[1051.64]TER.G<br>K.QLEK[1059.57]LR.L                                                                                                                                                                                                                                                                                                                                                                                                                                                                                                                                                                                                                                                                                                                                   |
| 12   | MEC1:395---MEC1:402   | K.QLEK[978.68]LR.L<br>K.QLEK[978.68]LR.L<br>R.LLVLK[1051.64]K.F<br>R.LLVLK[1051.64]K.F                                                                                                                                                                                                                                                                                                                                                                                                                                                                                                                                                                                                                                                                                       |
| 13   | MEC1:1552---MEC1:1577 | K.EWYSIGLEAANLEGNVQTLK[2748.54]NWWVEQIESLR.N<br>R.EVLLQYNIK[3754.92]ALIAISNEDPLR.T                                                                                                                                                                                                                                                                                                                                                                                                                                                                                                                                                                                                                                                                                           |
| 14   | MEC1:1954---MEC1:1979 | R.Q[111.03]HSQNPHDLVSSALDLTK[1564.9]ALTR.V<br>R.Q[111.03]HSQNPHDLVSSALDLTK[1089.65]ALTR.V<br>R.Q[111.03]HSQNPHDLVSSALDLTK[1564.9]ALTR.V<br>R.QHSQNPHDLVSSALDLTK[1564.9]ALTR.V<br>R.QHSQNPHDLVSSALDLTK[1089.65]ALTR.V<br>R.QHSQNPHDLVSSALDLTK[1089.65]ALTR.V<br>R.QHSQNPHDLVSSALDLTK[1089.65]ALTR.V<br>R.QHSQNPHDLVSSALDLTK[1089.65]ALTR.V<br>R.QHSQNPHDLVSSALDLTK[1089.65]ALTR.V<br>R.GK[2679.4]HILEK[284.17]YR.Q<br>R.GK[2679.4]HILEK.Y<br>R.GK[2679.4]HILEK[284.17]YR.Q<br>R.GK[2696.42]HILEK[284.17]YR.Q<br>R.GK[2696.42]HILEK.Y<br>R.GK[2696.42]HILEK.Y<br>R.GK[2696.42]HILEK.Y<br>R.GK[2696.42]HILEK.Y                                                                                                                                                                  |
| 15   | MEC1:1072---MEC1:1592 | R.TQK[926.52]YIHNSFR.L<br>R.TQK[926.52]YIHNSFR.L<br>R.K[1558.83]QTER.S<br>R.K[1558.83]QTER.S                                                                                                                                                                                                                                                                                                                                                                                                                                                                                                                                                                                                                                                                                 |
| 16   | MEC1:1072---MEC1:1494 | K.FSDDPK[926.52]TTTR.M<br>R.K[1432.72]QTER.S                                                                                                                                                                                                                                                                                                                                                                                                                                                                                                                                                                                                                                                                                                                                 |
| 17   | MEC1:1072---MEC1:515  | R.INPNRPEAAGK[926.52]SEIFR.I<br>R.INPNRPEAAGK[926.52]SEIFR.I<br>R.K[2064.11]QTER.S<br>R.K[2064.11]QTER.S                                                                                                                                                                                                                                                                                                                                                                                                                                                                                                                                                                                                                                                                     |
| 19   | MEC1:1072---MEC1:1083 | R.SIDFTPK[926.52]K.V<br>R.SIDFTPK[926.52]K.V<br>R.SIDFTPK[1082.62]K.V<br>R.SIDFTPK[1082.62]K.V<br>R.K[1200.68]QTER.S<br>R.K[1200.68]QTER.S<br>R.RK[1200.68]QTER.S<br>R.RK[1200.68]QTER.S                                                                                                                                                                                                                                                                                                                                                                                                                                                                                                                                                                                     |
| 20   | MEC1:1072---MEC1:697  | R.QLGK[926.52]NLVER.K<br>R.K[1321.77]QTER.S                                                                                                                                                                                                                                                                                                                                                                                                                                                                                                                                                                                                                                                                                                                                  |
| 21   | MEC1:361---MEC1:380   | K.FNIWVYQSEPDSSLK[1641.9]NVTSPFDDR.Y<br>R.SLPVEALK[3109.5]YDNK.F                                                                                                                                                                                                                                                                                                                                                                                                                                                                                                                                                                                                                                                                                                             |

|    |                       |                                                                                                                                                                                                                                                                |                                                                                                                                                                                                    |
|----|-----------------------|----------------------------------------------------------------------------------------------------------------------------------------------------------------------------------------------------------------------------------------------------------------|----------------------------------------------------------------------------------------------------------------------------------------------------------------------------------------------------|
| 22 | MEC1:2103---MEC1:2294 | K.FNIWVYQSEPDSSLK[1641.9]NVTSPFDDR.Y<br>R.QDNQYMQFATTMDFLLSK[2304.19]DIASR.K<br>R.QDNQYMQFATTMDFLLSK[2304.19]DIASR.K                                                                                                                                           | R.SLPVEALK[3109.5]YDNK.F<br>R.K[2988.44]NEVALMNVETIMYDR.N<br>R.K[2988.44]NEVALMNVETIMYDR.N                                                                                                         |
| 23 | MEC1:1731---MEC1:2294 | R.LPQAELEFAEILWK[2304.19]QGENDR.A                                                                                                                                                                                                                              | R.K[2651.36]NEVALMNVETIMYDR.N                                                                                                                                                                      |
| 24 | MEC1:1494---MEC1:1592 | R.TQK[1432.72]YIHNSFR.L                                                                                                                                                                                                                                        | K.FSDDPK[1558.83]TTTR.M                                                                                                                                                                            |
| 25 | MEC1:472---MEC1:515   | R.LAC[160.03]LESEK[2064.11]FSGTLPNSTK.D<br>R.LAC[160.03]LESEK[2064.11]FSGTLPNSTK.D<br>R.LAC[160.03]LESEK[2064.11]FSGTLPNSTK.D<br>R.LAC[160.03]LESEK[2064.11]FSGTLPNSTK.D<br>R.LAC[160.03]LESEK[2064.11]FSGTLPNSTK.D<br>R.LAC[160.03]LESEK[2064.11]FSGTLPNSTK.D | R.INPNRPEAAGK[2247.15]SEIFR.I<br>R.INPNRPEAAGK[2247.15]SEIFR.I<br>R.INPNRPEAAGK[2247.15]SEIFR.I<br>R.INPNRPEAAGK[2247.15]SEIFR.I<br>R.INPNRPEAAGK[2247.15]SEIFR.I<br>R.INPNRPEAAGK[2247.15]SEIFR.I |
| 26 | MEC1:697---MEC1:703   | R.K[1321.77]VGFQNLIELLGYSSK.T<br>R.K[1321.77]VGFQNLIELLGYSSK.T<br>R.K[1321.77]VGFQNLIELLGYSSK.T<br>R.K[1321.77]VGFQNLIELLGYSSK.T                                                                                                                               | R.QLGK[2061.15]NLVER.K<br>R.QLGK[2061.15]NLVER.K<br>R.QLGK[2061.15]NLVER.K<br>R.QLGK[2061.15]NLVER.K                                                                                               |
| 27 | MEC1:1577---MEC1:1592 | R.EVLLQYNIAK[1558.83]ALIAISNEDPLR.T<br>R.EVLLQYNIAK[1558.83]ALIAISNEDPLR.T<br>R.EVLLQYNIAK[1558.83]ALIAISNEDPLR.T<br>R.EVLLQYNIAK[1558.83]ALIAISNEDPLR.T<br>R.EVLLQYNIAK[1558.83]ALIAISNEDPLR.T<br>R.EVLLQYNIAK[1558.83]ALIAISNEDPLR.T                         | R.TQK[2748.54]YIHNSFR.L<br>R.TQK[2748.54]YIHNSFR.L<br>R.TQK[2748.54]YIHNSFR.L<br>R.TQK[2748.54]YIHNSFR.L<br>R.TQK[2748.54]YIHNSFR.L<br>R.TQK[2748.54]YIHNSFR.L                                     |
| 28 | MEC1:402---MEC1:406   | K.FNK[978.68]TER.G<br>K.FNK[978.68]TER.G<br>K.FNK[978.68]TER.G<br>K.FNK[978.68]TER.G<br>K.FNK[978.68]TER.G                                                                                                                                                     | R.LLVLK[1059.57]K.F<br>R.LLVLK[1059.57]K.F<br>R.LLVLK[1059.57]K.F<br>R.LLVLK[1059.57]K.F<br>R.LLVLK[1059.57]K.F                                                                                    |
| 29 | MEC1:402---MEC1:414   | R.GTLLK[978.68]YR.V<br>R.GTLLK[978.68]YR.V                                                                                                                                                                                                                     | R.LLVLK[1115.67]K.F<br>R.LLVLK[1115.67]K.F                                                                                                                                                         |
| 30 | MEC1:1998---MEC1:2054 | R.FGSSYK[1013.58]VFSSLK.K                                                                                                                                                                                                                                      | R.SGK[1614.87]SLEK.D                                                                                                                                                                               |
| 31 | MEC1:1843---MEC1:2294 | R.K[953.57]NEVALMNVETIMYDR.N<br>R.K[953.57]NEVALMNVETIMYDR.N                                                                                                                                                                                                   | K.NTAK[2304.19]VR.E<br>K.NTAK[2304.19]VR.E                                                                                                                                                         |

\*\*\* N for Nexus, P for pLink, NP for Nexus and Plink

## References

- Chan SW, Chang J, Prescott J, Blackburn EH. 2001. Altering telomere structure allows telomerase to act in yeast lacking ATM kinases. *Curr Biol* **11**: 1240-1250.
- Morrison AJ, Kim JA, Person MD, Highland J, Xiao J, Wehr TS, Hensley S, Bao Y, Shen J, Collins SR et al. 2007. Mec1/Tel1 phosphorylation of the INO80 chromatin remodeling complex influences DNA damage checkpoint responses. *Cell* **130**: 499-511.
- Wang H, Elledge SJ. 2002. Genetic and physical interactions between DPB11 and DDC1 in the yeast DNA damage response pathway. *Genetics* **160**: 1295-1304.
